1  
2 **Convergence and divergence of the adaptive landscape in**  
3 **two ecologically similar and sympatric damselfly species**  
4  
5

6 Anjali Gupta<sup>1,2†</sup>, Erik I. Svensson<sup>2‡</sup>, Henrik Frietsch<sup>2</sup> and Masahito Tsuboi<sup>2‡</sup>  
7  
8

9 1. Department of Biological Sciences, Indian Institute of Science Education and Research  
10 Mohali, Sector 81, SAS Nagar, Mohali, Punjab 140306, India

11 2. Department of Biology, Lund University, Sölvegatan 37, 22362 Lund, Sweden  
12

13 †Current address: Department of Ecology & Evolutionary Biology, University of Kansas,  
14 Lawrence, KS 66045, United States  
15

16 ‡Corresponding authors: Erik I. Svensson ([erik.svensson@biol.lu.se](mailto:erik.svensson@biol.lu.se)), Masahito Tsuboi  
17 ([masa.tsuboi@gmail.com](mailto:masa.tsuboi@gmail.com))  
18

19 Running title: Comparison of adaptive landscape in two damselflies  
20

21 Acknowledgements: We thank Stephen de Lisle and Viktor Nilsson-Örtman for discussions on  
22 earlier versions of analyses and manuscripts, Seth Donoughe for helping us with image  
23 processing, and Benjamin Jarrett, Emma Kärrnäs, Moritz Lürig, Ayushi Mahajan, Muskaan,  
24 Sofie Nilén, Karolina Pehrson and Kajsa Svensson for assisting our field work. This study was  
25 supported by the Swedish Research Council grant for EIS (2020-03123) and MT (2016-06635).  
26

27 Conflict of Interest: We have no conflicts of interest to declare.  
28

29 Data accessibility: Data and code will be archived in DRYAD upon acceptance.

30 **Abstract**

31

32 Following the development of regression-based methods to estimate natural and sexual selection,  
33 evolutionary biologists have quantified the strength, mode and direction of selection in natural  
34 populations. Although this approach has been successful, its limitations include lack of  
35 replication across species, compromising the generality of the inferences beyond  
36 microevolutionary time scales. Here, we carried out a comparative selection study on wing shape  
37 and body size, two important fitness-related traits, in two closely related and ecologically similar  
38 pond damselflies: *Enallagma cyathigerum* and *Ischnura elegans* (family Coenagrionidae).  
39 Through field surveys, we demonstrated that female *I. elegans* experience stronger male mating  
40 harassment while the opportunity for sexual selection is greater in males of *E. cyathigerum*  
41 compared to *I. elegans*. Our data revealed directional selection favoring large body size in  
42 females of both species, weak stabilizing selection on wing shape in both sexes of both species,  
43 while curvilinear sexual selection on male body size was divergent between the two species. Our  
44 study thus revealed both convergence and divergence of the adaptive landscape, and illustrates  
45 that even closely related sympatric species can differ substantially in their selective regimes due  
46 to differences in their social organization and mating systems.

47

48 **Key words:** Adaptive landscape, natural selection, sexual selection, *Ischnura elegans*,  
49 *Enallagma cyathigerum*

50

51

## 52 Introduction

53

54 Since Russel Lande and Steven Arnold introduced regression-based statistical methods to  
55 quantify natural and sexual selection nearly four decades ago (Lande & Arnold, 1983),  
56 evolutionary biologists have sought to identify causes and consequences of phenotypic selection  
57 in nature (Endler, 1986; Mitchell - Olds & Shaw, 1987; Wade & Kalisz, 1990; Kingsolver &  
58 Diamond, 2011). This has resulted in a rich scientific literature about the strength, mode and  
59 direction of selection in wild populations of animals and plants (Kingsolver *et al.*, 2001;  
60 Siepielski *et al.*, 2009, 2011, 2013, 2017; Kingsolver & Diamond, 2011). However,  
61 methodological problems remain and criticisms were directed towards naïve applications of  
62 these statistical methods. Early criticisms emphasized that trait-fitness covariances are not  
63 necessarily causal and should be viewed as preliminary hypotheses in need of experimental  
64 verification through trait manipulations (Mitchell - Olds & Shaw, 1987), for instance, because of  
65 confounding factors such as environmental covariances between traits and fitness (Rauscher,  
66 1992; Stinchcombe *et al.*, 2002). Another important challenge is to identify environmental  
67 agents, demographic factors and ecological causes behind observed selection (Wade & Kalisz,  
68 1990; Svensson & Sinervo, 2000; MacColl, 2011; Siepielski *et al.*, 2017). Different approaches  
69 have been suggested to verify the causality of selection, including path analysis (Kingsolver &  
70 Schemske, 1991), experimental manipulations of phenotypic traits (Sinervo *et al.*, 1992) or  
71 selective environments (Wade & Kalisz, 1990) or simultaneous “double-level” manipulations of  
72 both traits and selective agents (Sinervo & Basolo, 1996; Svensson & Sinervo, 2000). More  
73 recently, various issues associated with conceptualizations and measurements of selection have  
74 been identified, such as standardization of traits (Hereford *et al.*, 2004) and fitness (De Lisle &  
75 Svensson, 2017), measurement error in traits (Morrissey & Hadfield, 2012; Dingemanse *et al.*,  
76 2021) and fitness (Waller & Svensson, 2016), and visualization of univariate (Schluter, 1988;  
77 Brodie *et al.*, 1995) and multivariate selection (Phillips & Arnold, 1989; Schluter & Nychka,  
78 1994; Blows & Brooks, 2003; Blows *et al.*, 2004; Blows, 2007; Chenoweth *et al.*, 2012;  
79 Svensson *et al.*, 2021).

80

81 One way to address these problems is to combine information gathered from several different  
82 sources and integrate such information in a common conceptual framework. The adaptive  
83 landscape provides such a framework to unify phenotypic selection within populations with  
84 patterns of phenotypic divergence between populations and species (Arnold *et al.*, 2001;  
85 Svensson & Calsbeek, 2012). Under this framework, populations are conceptualized as evolving  
86 on a landscape which describes the relationship between relative fitness and phenotypic values,  
87 subject to selection, genetic drift and mutation (Lande, 1976). Populations are expected to climb  
88 the closest adaptive peak where short-term fitness is maximized (Wright, 1932) whereas genetic  
89 correlations can bias the evolutionary trajectories towards directions with high amount of  
90 additive genetic variance (Schluter, 1996; Walsh & Blows, 2009). Estimates of linear and  
91 quadratic selection coefficients and correlational selection (Phillips & Arnold, 1989; Brodie *et al.*,  
92 1995; Svensson *et al.*, 2021) capture local landscape topography, which can in turn be used  
93 to infer the dynamics of landscape itself (Chevin & Lande, 2015; De Villemereuil *et al.*, 2020)  
94 and enable macroevolutionary predictions (Estes & Arnold, 2007; Uyeda *et al.*, 2011; Hansen,  
95 2014). However, selection estimates do not in themselves inform us about ecological causes and  
96 selective agents. To infer selective agents and ecological causes of selection we also need to  
97 quantify local selective environments through functional analysis, experimental manipulations of

98 agents or collect detailed field observations in natural settings (Svensson & Sinervo, 2000;  
99 MacColl, 2011; Opedal, 2021). In some cases, it is possible to directly identify selective causes  
100 (Brown & Brown, 2013), e.g., by comparing surviving phenotypes with phenotypes killed by  
101 predators (Young *et al.*, 2004; Svensson *et al.*, 2007; Kuchta & Svensson, 2014) or those  
102 phenotypes dying from natural causes (Bumpus, 1899).

103

104 An underutilized approach is to compare closely related species inhabiting similar physical  
105 environments and which largely share the same ecological niche. Comparative studies of  
106 selection in different populations and/or between closely related species are still relatively few,  
107 however, largely due to the logistical challenges to obtain sufficient spatial and temporal  
108 replication (Nishida, 1994; Gosden & Svensson, 2008; Siepielski *et al.*, 2009, 2017; Punzalan *et*  
109 *al.*, 2010; De Villemereuil *et al.*, 2020). The insect order Odonata (dragonflies and damselflies)  
110 provides unique opportunities for such comparative studies of selection, because a rich  
111 background knowledge of natural history (Corbet, 1999) enables researchers to characterize the  
112 adaptive landscape in different environmental contexts. Here, we characterized the strength,  
113 mode and direction of selection in two ecologically and phenotypically similar sympatric  
114 damselfly species: the common bluetail damselfly (*Ischnura elegans*) and the common bluet  
115 (*Enallagma cyathigerum*). These two species and other members of the family Coenagrionidae  
116 (pond damselflies) have similar ecological niches and show evidence of neutral community  
117 dynamics and ecological drift (McPeck & Brown, 2000; Siepielski *et al.*, 2010). Yet, recent  
118 molecular evidence suggest that these two genera have been separated by >12 million years of  
119 independent evolution (Swaegers *et al.*, 2014; Callahan & McPeck, 2016; Blow *et al.*, 2021). By  
120 comparing phenotypic selection on homologous phenotypic traits in these close relatives that  
121 inhabit similar environments, we addressed questions about stability and species differences in  
122 the adaptive landscape and how landscape structure might influence phenotypic evolution at  
123 macroevolutionary time scales.

124

125 We estimated univariate and multivariate selection on two important fitness-related traits in  
126 sympatric populations of these species: body size and wing shape. Body size affects both male  
127 mating success and female fecundity in many species of insects (Bonduriansky, 2001) and it is  
128 often target of natural selection on fecundity in females and sexual selection in males (McCauley  
129 & Wade, 1978; Arnqvist, 1992; Sokolovska *et al.*, 2000; Waller & Svensson, 2017). Mate choice  
130 in damselflies is also affected by the fit between male (cerci) and female (mesostigmal plates)  
131 reproductive structures, both of which are traits that scale with body size (McPeck *et al.*, 2008;  
132 Steele *et al.*, 2011). Wing shape, in turn, is related to the flight performance in insects (Ellington,  
133 1984; Dickinson *et al.*, 1999; Templin, 2000), and influences foraging efficiency, mate search  
134 and predation avoidance, that constitute major determinants of adult fitness in damselflies  
135 (Anholt, 1991).

136

137 We have three objectives. First, we compared demographic and mating system parameters of  
138 these two species, including the opportunity for sexual selection (Arnold & Wade, 1984), mating  
139 frequencies, male and female densities, operational sex ratio (OSR) and the frequency of male-  
140 mimicking female color morphs (“androchromes”). These mating system parameters provide  
141 information about the social system in these two species, including the role of sexual selection

142 through male-male competition (opportunity for sexual selection, OSR, male density) and the  
143 intensity of male mating harassment (mating frequencies and the frequency of androchrome  
144 female morphs as proxy for sexual conflict; see Svensson *et al.*, 2005; Gosden & Svensson,  
145 2009; Takahashi *et al.*, 2014; Blow *et al.*, 2021). Second, we compared the adaptive landscapes  
146 for wing shape and body size in both these species and in both sexes. Finally, we combined  
147 information from these two sources to interpret the ecological and social causes of selection  
148 explaining similarities and differences in the selective regimes. We also discuss the  
149 macroevolutionary consequences of divergence and convergence in adaptive landscapes across  
150 these species.

151

## 152 **Materials & Methods**

153

154 **Study system:** We study two species of damselflies, the common bluet, *Enallagma cyathigerum*  
155 and the common bluetail damselfly, *Ischnura elegans* in the family Coenagrionidae (Odonata;  
156 Zygoptera). These species are generalist predators that feed on small flying insects and they  
157 occur in diverse aquatic habitats, typically open landscapes in ponds, lake shores, and slow  
158 flowing streams (Smallshire & Swash, 2020). Both species are broadly distributed across the  
159 Palearctic (Smallshire & Swash, 2020). Females of both species are polymorphic; females of *E.*  
160 *cyathigerum* exhibit two color morphs: androchrome (mature females with blue thorax  
161 mimicking males; Fig. 1A ii) and gynochrome (mature females with olive-green thorax; Fig. 1A  
162 iii), while females of *I. elegans* exhibit three color morphs during the adult stage: androchrome  
163 (mature females with blue thorax; Fig. 1A v), *infuscans* (Fig. 1A vi) and *infuscans-obsolata* (Fig.  
164 1A vii, Svensson *et al.*, 2020; Willink *et al.*, 2020). In southern Sweden, populations of *E.*  
165 *cyathigerum* and *I. elegans* widely occur in sympatry. The reproductive season for both species  
166 ranges from late April to early August. Males of both species engage in scramble competition  
167 over the opportunity for mating. Males are non-territorial and found resting or flying near the  
168 waterbody, chase any females that approach the waterbody, and compete for the opportunity to  
169 grab the females by the prothorax using the clasper in the tip of males' abdomen. A male that  
170 successfully clasps a female will form the "tandem position", followed by the formation of "a  
171 mating wheel" (Fig. 1D) during which egg fertilization takes place (Corbet, 1999). After a  
172 successful mating, male *E. cyathigerum* continues to guard the female in the tandem position  
173 while the female oviposition over open water, whereas male *I. elegans* leave the female to  
174 oviposition unguarded (M. Tsuboi, H. Frietsch and E.I. Svensson, personal observations; see also  
175 Fig. 1E).

176

177 **Field work:** Field surveys were carried out to collect *I. elegans*, and *E. cyathigerum* at 20  
178 different field sites in and around Lund, Sweden. Field sampling was conducted at small ponds  
179 in the following localities: Borgeby, Bunkeflostrand, Flackarp, Flyinge 30 A1, Flyinge 30 A3,  
180 Genarp, Gunnesbo, Hoje A14, Hoje A6, Hoje A7, Habo Gard, IKEA, Ilstorp, Krutladan,  
181 Ladugårdsmarken, Lomma, Lunnarp, Råbydammen, Vombs vattenverk, and Vombs Bruksgård  
182 (Fig. S1). Individuals were captured using hand-held nets while slowly walking around  
183 waterbodies. Upon capture of individuals flying without a partner, we examined sex and kept  
184 males and females separately in small net cages. Individuals found as either a tandem or as a  
185 copulating couple were kept in plastic cups. We visited these populations between the hour of  
186 08.00 and 13.00 in all partially or fully sunny days with temperature >15°C in May, June and



187 July of 2020 and 2021. At each visit, we sampled between 20 and 30 minutes, and between 3-5  
188 people participated in the sampling. The captured damselflies were kept in cooling bags to  
189 protect them from overheating, and were brought back to the lab for recording phenotypic data  
190 and setting up mated females for egg-laying for fecundity measurements. For each individual, we  
191 recorded sex, female morph, and morphometric measurements (see next section for more detail).  
192 The dataset obtained from this field survey include 58 sampling visits to capture *I. elegans* (in  
193 2020 and 2021) and 27 sampling visits to capture *E. cyathigerum* (in 2021), and constitutes in  
194 total of 497 single males, 236 single females, and 524 couples of *I. elegans* and 420 single males,  
195 181 single females, and 411 couples of *E. cyathigerum*. This dataset will be used to estimate  
196 selection gradients presented further in this study.

197 In a complementary field study, we quantified and compare social organization and mating  
198 systems of *I. elegans* and *E. cyathigerum*. This was part of a community survey where we  
199 captured individuals of damselflies and dragonflies regardless of the species identity along  
200 predefined transects, with the aim of quantifying species composition, operational sex-ratio and  
201 density of local Odonata fauna. At each visit, 3-5 people sampled between 10-20 minutes, who  
202 identified and recorded all captured individuals in terms of species, sex, female color morph,  
203 sexual maturity and mating status (either captured as single or copula/tandem). After recording  
204 this information, animals were released. We used data of *I. elegans* and *E. cyathigerum* from  
205 four seasons (2018-2021) that were collected during a total of 366 visits. These data constitute a  
206 total observation of 3527 single males, 1788 single females, and 630 couples of *I. elegans* and  
207 3031 single males, 403 single females, and 282 couples of *E. cyathigerum*. This dataset was used  
208 to compare and quantify differences in mating system and social organizations between these  
209 two species.

210

211 **Fitness components:** To measure phenotypic selection, we quantified two fitness components:  
212 (1) mating success that characterizes sexual selection in males and (2) fecundity that  
213 characterizes natural selection in females. Sexual selection on males was estimated by comparing  
214 the phenotypes of mated males with unmated males upon capture in the field. Males that were  
215 captured in tandem or in a copula were classified as ‘mated’ and assigned a mating success of  
216 ‘1’, while males that were captured solitary were classified as ‘single’ and their mating success  
217 were assigned to ‘0’. This is an established technique of quantifying mating success in  
218 damselflies (Gosden & Svensson, 2008; Steele *et al.*, 2011). To measure female fecundity, we  
219 placed females captured in mated couples in small plastic cups with moist coffee filter to let the  
220 female lay eggs for 48hrs. The number of eggs laid by each female was subsequently counted.  
221 The number of eggs laid during this time interval likely reflects the recent ecological conditions  
222 a given female has experienced preceding oviposition, and should capture her past history of  
223 food intake rates and ambient temperatures (Svensson & Abbott, 2005; Svensson *et al.*, 2020).  
224 This fecundity measure thus provides a measure of fitness and natural selection in females.

225

226 **Morphometric measurements and wing image acquisition:** We obtained digital images of all  
227 captured individuals using a scanner (CanoScan 5600F) at a resolution of 600 dpi to get  
228 estimates of body size. Five linear measurements were taken for each individual to capture  
229 different aspects of the body size: total body length, thorax width, abdomen length, wing length,  
230 and width of the S4 segment (Fig. 1B). Individuals were measured from these photographs using  
231 the computer program, Fiji (Schindelin *et al.*, 2012). All measurements were originally recorded

232 in units of pixel, which was then converted to millimeter (mm) based on a conversion between  
233 mm and pixel at a resolution of 600 dpi. After the scan has been completed, individuals were  
234 sacrificed by exposing them to cold temperature. From sacrificed individuals, we dissected fore-  
235 and hindwings from both left and right side of the body. Dissected wings were then placed in a  
236 wet coffee filter, covered with a transparent plastic sheet, then scanned at a resolution of 2000  
237 dpi. We obtained images for a total of 5764 wings belonging to *E. cyathigerum*, and a total of  
238 7704 wings belonging to *I. elegans*.

239

240 **Automated assay of wing shape using ML-morph:** We used a recently developed machine  
241 learning tool “ML-morph” (Porto & Voje, 2020) to measure the x-y coordinates of 17 landmark  
242 that characterize wing venation patterns (Fig. 1C). First, a training set was constructed to train  
243 ML-morph to identify the landmark positions in the wing image. We used a training set  
244 containing 400 wing images that was landmarked manually using Imglab version 1.18 (compiled  
245 from Python module dlib-19.23). These 400 images subset in the training set contained a random  
246 mixture of 100 images of the 4 wings (right forewing, right hindwing, left forewing, left  
247 hindwing) of a male *I. elegans*, 100 images of a female *I. elegans*, 100 images of a male *E.*  
248 *cyathigerum*, and 100 images of a female *E. cyathigerum*. This training set represents variation  
249 in wing shape with respect to sex, species, and fore- or hind-wing assignment, that are  
250 considered as main source of variation in our sample set.

251 We used *shape.predictor* function of the ML-Morph to train the algorithm for landmarking the  
252 wing. Then, we tested the ability of ML-Morph to landmark wings accurately using *shape.test*  
253 function, where we compared automated landmarking by ML-morph to manual landmarks,  
254 which responded to 99.2% precision in the landmarking using automation in a test set build from  
255 the training set. Finally, we applied *shape.predictor* function to landmark the remaining image  
256 set that have not been landmarked. All landmarked images were later checked manually for any  
257 errors, and inconsistent landmarks across all images were corrected. We removed 357 images  
258 (178 for *I. elegans* and 179 for *E. cyathigerum*) from the dataset before analysis because they  
259 contained an injured/broken wing where position of 1 or more landmarks could not be deduced  
260 accurately. Examination of erroneous images were done by one observer (AG).

261

262 **Geometric morphometrics and dimension reduction:** The wings of the two damselfly species  
263 were standardized through geometrics morphometrics analysis. We performed a Generalized  
264 Procrustes Analysis (GPA) on the 17 landmarks including all measured wings using geomorph  
265 package version 4.0.5. GPA transforms the landmarks by rotating, aligning, and scaling so that  
266 the resulting landmarks (i.e., aligned coordinates) describe the wing shape alone. The aligned  
267 coordinates, however, still have 30 dimensions, and dimensional reduction was necessary for  
268 further analyses. We employed two complementary approaches for dimension reduction. First,  
269 we performed a principal component analysis (PCA) on the matrix containing the aligned  
270 coordinates of both species to reduce dimensionality of the major axis of morphological  
271 variation. Second, we performed a linear discriminant analysis (LDA) on the aligned coordinates  
272 with species as a classifier using MASS package version 7.3-53. We also performed a principal  
273 components analysis (PCA) on the covariance matrix of natural logarithmic values of the five  
274 size traits (total body length, thorax width, abdomen length, wing length, and width of the S4  
275 segment) for both species and sexes. We log-transformed the values for the size traits before

276 running the PCA, so that the resultant PC values became mean-standardized. We averaged  
277 values obtained from left and right side of the wing of an individual whenever both sides were  
278 measured. When only one side of the wing was available, we used that available side as a  
279 representative measure. Since we found no directional asymmetry in wing shape in two species  
280 we examined (results not shown), this will unlikely create systematic bias in our measurements.  
281 In 62 individuals, we obtained scan images twice at two independent scanning sessions to  
282 evaluate measurement error due to variation in our imaging process and found that the  
283 measurement errors in aligned coordinates associated with the difference in images are on  
284 average 0.19% of the centroid size (range: 0% - 3.34%, Fig. S2). Since this level of error is  
285 negligible compared to the effect sizes of all analyses presented in this research, it will not be  
286 accounted for in subsequent statistical analyses of wing shape.

287

288 **Quantifying social organization and mating system:** For quantitative estimation of social  
289 organization in the two damselfly species, we measured the following parameters: male density  
290 (total number of males caught per sampling event / total catching time, unit = number of  
291 individuals captured per minute), female density (total number of males caught per sampling  
292 event / total catching time, unit = number of individuals captured per minute), operational sex  
293 ratio (ratio of the number of mature males to the number of mature females of a species caught  
294 at a locale in a given year, unit = %), androchrome frequency (ratio of the number of the  
295 androchrome female morph of a species to the total number of females of a species whose morph  
296 was identified caught in one locale in one year, unit = %), the proportion copulating males  
297 (number of males in copula / total number of males caught during one sampling, unit = %) and  
298 the opportunity for sexual selection ( $I_s$ , variance in male mating success / (average male mating  
299 success)<sup>2</sup>, unitless elasticity) (Arnold & Wade, 1984). We estimated  $I_s$  for every locale from  
300 where we sampled populations of *E. cyathigerum* and *I. elegans*. Male mating success was  
301 defined as a binomial variable that could be either 0 or 1. We calculated variance in male mating  
302 success based on the data on the proportion of single and copulating males at each site and mean  
303 male mating success. The latter (mean male mating success) was calculated by the mean  
304 proportion of male (belonging to one species) mating at a particular locale in one field season  
305 (e.g., 0.10 if 10% are found in copula). The variance in mating success was evaluated as  $\frac{p \times (1-p)}{n}$   
306 where  $p$  is the probability of being found as a couple and  $n$  is the sample size. We tested for the  
307 difference in social organization indices between *E. cyathigerum* and *I. elegans* using a mixed  
308 effect model implemented in lme4 package (Bates *et al.*, 2015) with one of the six parameters as  
309 the response variable, species as the fixed explanatory variable and sampling year and location at  
310 which individuals were captured (hereafter referred to as locale) as the random effect.

311 **Selection gradients:** We used standard multiple-regression analyses to estimate the selection  
312 gradients (Lande & Arnold, 1983). Selection gradients were evaluated for body size (size-PC1)  
313 and wing shape (LD1) using mating success in the field as a male fitness component and the  
314 number of eggs laid as the female fitness component. Both linear ( $\beta$ ) and quadratic ( $\gamma$ ) selection  
315 coefficients were estimated for both species and sexes for all the traits using linear mixed effect  
316 models with locale as the random factor. The partial regression coefficients of models that  
317 includes only linear (i.e. unsquared) term were used to estimate  $\beta$ , while  $\gamma$  was estimated as the  
318 partial regression coefficients of models that includes both unsquared and squared terms. The



319 quadratic regression coefficients were multiplied by two (Stinchcombe *et al.*, 2008). We also  
320 performed full multivariate analysis on both these traits to visually verify the quadratic  
321 relationships using cubic splines (Schluter, 1988). Fitness components (mating success for male  
322 and the number of eggs laid for females) were standardized within species and sexes, by dividing  
323 individual fitness with the mean fitness estimates (De Lisle and Svensson 2017). Since both size-  
324 PC1 and wing shape LD1 are scaled to its own value either by taking a natural logarithm of size  
325 measurements or by performing the Generalized Procrustes Analyses, selection gradients  
326 evaluated in these traits are on the mean-standardized scale without additional transformations.  
327 For comparison, we also estimated the variance-standardized selection gradients by dividing  
328 them with standard deviation of the trait within species.

329 Estimation of selection gradients and statistical comparisons of differences between species were  
330 made using random mixed effect models. We constructed three sets of models, which all  
331 included locale as the random effect. First, for each sex and species separately, we modeled  
332 fitness component as the response variable and one of examined traits (size-PC1, forewing shape  
333 LD1, hindwing shape LD1) and its squared terms as the fixed explanatory variables. Second, we  
334 constructed two bivariate models, for each sex and species separately, with the same model  
335 specifications as above but include either size-PC1 and forewing shape LD1 or size-PC1 and  
336 hindwing shape LD1 and their interaction and squared terms as the fixed explanatory variables.  
337 Finally, we constructed two models for each sex separately, with the fitness component as the  
338 response variable, size-PC1 and forewing shape LD1 or size-PC1 and hindwing shape LD1 with  
339 their squared terms, species (either *I. elegans* or *E. cyathigerum*) and interaction terms between  
340 species and all traits as the fixed explanatory variables. In this model, we identified the best  
341 model with a backward model selection procedure based on AICc (sample size-corrected Akaike  
342 Information Criterion) values. In this approach, a comparison of AICc between two nested  
343 models with and without a focal parameter provides statistical support for the effect of the focal  
344 parameter. All analyses were performed in RStudio version 4.0.4 and visualization of data and  
345 results were performed using ggplot2 package version 4.0.5.

346

## 347 **Results**

348

349 **Social organization and mating system:** Comparison of social organization between *I. elegans*  
350 and *E. cyathigerum* are presented in Figure 2. We found statistical evidence for differences in  
351 social organization and mating system between the two species in all examined parameters  
352 except for male density (Table S1). Males of *I. elegans* were roughly twice as more often found  
353 as mating couple as *E. cyathigerum* (proportion of copula; *I. elegans*: mean  $\pm$  SE =  $0.129 \pm$   
354  $0.015$ , *E. cyathigerum*:  $0.077 \pm 0.013$ ), experienced 39% less opportunity of sexual selection ( $I_s$ )  
355 than *E. cyathigerum* ( $I_s$ ; *I. elegans*: mean  $\pm$  SE =  $0.211 \pm 0.044$ , *E. cyathigerum*:  $0.345 \pm 0.052$ ),  
356 and females of *I. elegans* had twice as high frequency of the male-mimicking phenotype  
357 (*androchrome*) as *E. cyathigerum* (*androchrome* frequency; *I. elegans*: mean  $\pm$  SE =  $0.458 \pm$   
358  $0.046$ , *E. cyathigerum*:  $0.267 \pm 0.116$ ). The operational sex-ratio is male-biased in both species,  
359 but significantly more so in *E. cyathigerum*, which partly reflects low overall density of females  
360 near the pond in this species compared to *I. elegans*.

361

362 **Dimension reduction of body size and wing shape:** A scatterplot of the first two principal

363 components of five body size measurements (Fig. S3) revealed clear and statistically significant  
364 size differences between *I. elegans* and *E. cyathigerum* and between sexes in both species (Fig.  
365 3A, Table S2). The degree of sexual dimorphism in body size is more pronounced in *I. elegans*  
366 than in *E. cyathigerum*, as revealed by significant interaction term between species and sex  
367 (estimate  $\pm$  SE =  $-0.277 \pm 0.009$ ,  $p < 0.001$ , Table S2). Since the first PC axis explained the vast  
368 majority (93.0 %) of the total variation in log of body size measurements, we hereafter used this  
369 axis (size-PC1) as our measure of body size.

370 Wing shape differed between *I. elegans* and *E. cyathigerum* and between fore- and hindwings in  
371 both species (Fig. S4). The first principal component (PC1) explained 41.9% of the total  
372 variation, and this axis separates forewings from hindwings in terms of the width of the wing.  
373 The forewings of both species have lower PC1 values along PC1 axis, which can be interpreted  
374 as narrower wings, while the hindwings of both species have higher values of PC, translating to  
375 broader wings. The second principal component (PC2) explained 19.2% of the total variation in  
376 wing shape, and this axis separates the two species. *E. cyathigerum* has broader proximal edge  
377 and narrower distal edge of wings as compared to *I. elegans*. Subsequent PC axes up to PC5  
378 explained 8.9%, 6.3%, and 5.9% of total variation, respectively.

379 A linear discriminant function analysis (LDA) with species as a grouping factor revealed that the  
380 axis that most effectively separates wings of the two species (wing shape LD1) represents the  
381 variation in the width of the wing, that occurs together with the stretch of two landmarks (LM9  
382 and LM16) at the center of wing (Fig. 3B). We found statistical support for sexual dimorphism in  
383 wing shape except for forewings of *E. cyathigerum* (Table S3) but visual inspection of effect  
384 sizes revealed that these sex differences in wing shape are small relative to sexual dimorphism in  
385 body size (Fig. 3). In what follows, we focus on LD1 because the goal of this study is to compare  
386 to *I. elegans* and *E. cyathigerum* with respect to overall wing shape, and LD1 captures this  
387 variation most efficiently. Results based on the first five principal components of wing shape are  
388 presented in supplementary materials.

389

390 **Selection gradients:** Selection gradients of size PC1 are presented in Table 1. Across both  
391 species, we found that selection favors females with large body sizes. Estimates of mean-  
392 standardized directional selection gradients ( $\beta$ ) in females (*I. elegans*:  $\beta \pm$  SE =  $1.569 \pm 0.295$ , *E.*  
393 *cyathigerum*:  $4.138 \pm 0.545$ ) means that doubling of body size would increase relative fitness by  
394 157% in *I. elegans* and 414% in *E. cyathigerum*. In males, selection on size PC1 was weaker,  
395 whereas the quadratic selection gradients ( $\gamma$ ) in *E. cyathigerum* indicate disruptive selection  
396 ( $\gamma \pm$  SE =  $5.551 \pm 2.726$ ) in favor of either small or large individuals.

397 Selection on wing shape LD1 was relatively weak across both sexes in the two species (Fig. 4,  
398 Table 1). The directional selection gradients ( $\beta$ ) showed that the selection typically favors  
399 narrow and elongated wings in *I. elegans* while broad and round wings are favored in *E.*  
400 *cyathigerum*. Considering the mean shape differences between the two species (Fig. 3B), these  
401 estimates suggest that, if all else being equal, directional selection would drive the convergent  
402 evolution of wing shape. The quadratic selection gradients ( $\gamma$ ) suggested stabilizing selection  
403 (i.e., negative  $\gamma$ ) on wing shape LD1 in all trait-sex-species combination except for forewing of  
404 *E. cyathigerum*, although not all these negative estimates were significant (Table 1). Together  
405 with the result of  $\beta$  that favors intermediate wing shape of the two species, wing shape appear to  
406 be under weak stabilizing selection in both *I. elegans* and *E. cyathigerum*. For both size PC1 and

407 wing shape LD1, variance-standardized gradients showed qualitatively equivalent results (Table  
408 1). Results based on PC1 to PC5 of wing shape are presented in supplementary materials (Table  
409 S4, Fig. S5).

410 The multivariate selection gradients, including correlational selection between size PC1 and  
411 shape LD1, are presented in Table 2, Figure 5, and Figure S6. Estimates of gradients are  
412 generally consistent with those obtained from univariate models, with one notable exception. In  
413 males of *E. cyathigerum*, the evidence for disruptive selection on body size in the univariate  
414 estimate of  $\gamma$  is shown to result from a combination of directional selection favoring small size ( $\beta$   
415  $\pm$  SE =  $-5.335 \pm 2.104$ ), a non-significant trend of disruptive selection on wing shape ( $\gamma \pm$  SE =  
416  $8.632 \pm 5.592$ ,  $p = 0.12$ ), and a marginal effect of negative correlational selection between body  
417 size and wing shape ( $\gamma \pm$  SE =  $-1.224 \pm 0.661$ ,  $p = 0.06$ ). Visualization of this selection surface  
418 revealed a complex adaptive topography in males of *E. cyathigerum* characterized by a fitness  
419 saddle with two fitness peaks where large and small males had higher mating success (Fig. 5B).  
420 The fitness surface of males of *I. elegans* was flatter with a tendency for weak stabilizing  
421 selection on body size ( $\gamma \pm$  SE =  $-3.272 \pm 2.234$ ,  $p = 0.07$ ). By contrast, the adaptive landscapes  
422 of females were simpler than males in both species. Correlational selection was virtually absent  
423 and fitness monotonically increased with body size consistent with the univariate estimates.

424

425 **Comparison of adaptive landscape between species:** Comparisons of the adaptive landscape  
426 between *I. elegans* and *E. cyathigerum* are summarized in Table S5. Pair-wise comparisons  
427 between a model and its nested model based on AICc values indicate that the adaptive landscape  
428 is divergent between the two species in terms of the quadratic terms of body size in males  
429 ( $\Delta$ AICc = 6.6 in a model with forewing,  $\Delta$ AICc = 7.3 in a model with hindwing) and in terms of  
430 the linear term of body size in females ( $\Delta$ AICc = 7.8 in a model with forewing,  $\Delta$ AICc = 8.3 in a  
431 model with hindwing). Thus, the disruptive selection on male body size in *E. cyathigerum* is  
432 absent or even takes the form of stabilizing selection in *I. elegans* (Table1, Fig. 4A) while in  
433 females, directional selection favoring large body sizes is stronger in *E. cyathigerum* than in *I.*  
434 *elegans* (Table1, Fig. 4D)

435

## 436 Discussion

437

### 438 *Ischnura elegans* and *Enallagma cyathigerum* differ in their social organization

439

440 Comparisons of mating system parameters in *I. elegans* and *E. cyathigerum* revealed interesting  
441 differences (Fig. 2). Compared to *E. cyathigerum*, *I. elegans* have higher female densities (Fig.  
442 2B), higher frequency of androchrome females (Fig. 2D), higher mating rates (Fig. 2E) and the  
443 opportunity for sexual selection is lower in this species (Fig. 2F). These species differences  
444 suggest that the form of sexual selection differs between *I. elegans* and *E. cyathigerum*. In *E.*  
445 *cyathigerum*, there is a classical mating system based on male-male competition over the  
446 opportunity for mating. In contrast, in *I. elegans*, sexual conflict through male mating harassment  
447 of females is the primary mechanism of sexual selection in *I. elegans* (Fig. 2C). Thus, although  
448 these species largely share the same habitat and engage in similar scramble male mate  
449 competition over females, the mechanism of sexual selection appear to differ. An important

450 qualitative difference between the mating system of these species might be differences in  
451 postcopulatory mate guarding during female oviposition (Corbet, 1999). In *I. elegans*, females  
452 oviposit alone, unguarded by the male, where they are likely to be more susceptible to mating  
453 harassment from other males who try to mate with vulnerable females during their oviposition  
454 phase. In contrast, in *E. cyathigerum*, males remain attached to the female in tandem position,  
455 even during female oviposition, suggesting that females are less vulnerable to male mating  
456 harassment (M. Tsuboi, H. Frietsch and E.I. Svensson, personal observations; Fig. 1E). These  
457 subtle but fundamental differences in pre- and post-mating behavior are likely causes of mating  
458 system differences and social structure between these two ecologically similar species.

459

## 460 **Causes of divergence and convergence in body size and wing morphology**

461

462 With this ecological background information of these two species in mind, we compared wing  
463 shape and body size, two traits that are targets of selection in adult Odonata (Sokolovska *et al.*,  
464 2000; Steele *et al.*, 2011; Outomuro *et al.*, 2016), between *I. elegans* and *E. cyathigerum* with the  
465 goal to understand the ecological causes behind the selective regimes operating on these traits.  
466 We found that *I. elegans* exhibit a more pronounced female-biased sexual size dimorphism than  
467 *E. cyathigerum* (Fig. 2A; Table S2). This might suggest difference in the form of sexual selection  
468 between *I. elegans* and *E. cyathigerum* has resulted in species difference in the degree of sexual  
469 size dimorphism. In *I. elegans*, small-size could be advantageous to maneuver in dense  
470 vegetation where mating typically take place. This preferred microhabitat in *I. elegans* might  
471 have driven down body size in males of this species. Previous work on sexual selection in *I.*  
472 *elegans* have revealed variable sexual selection on male body size, which can favor small males,  
473 large males or intermediate-sized males depending on ecological context and geographic position  
474 (Gosden & Svensson, 2008; Dudaniec *et al.*, 2022). In contrast, maneuverability might be less  
475 important in mate competition among male *E. cyathigerum*, where mating predominantly takes  
476 place over the open water and where the male remain attached to the female for an extended  
477 period of time during oviposition (Fig. 1E).

478 An alternative explanation for the difference in sexual size dimorphism between these two  
479 species is that natural or sexual selection in *I. elegans* females might have increased female body  
480 size in this species. For instance, stronger sexual conflict in *I. elegans* might have selected for  
481 larger females that can defend themselves against mate-harassing males. We also demonstrated  
482 that there is positive fecundity-selection towards larger female size in both these species (Fig.  
483 4D). Without additional and independent knowledge about the ancestral states in male and  
484 female body sizes of these two species, we cannot say which of these two historical scenarios is  
485 true. Nevertheless, the findings here should stimulate further investigation of body size evolution  
486 in a broader macroevolutionary context involving more species in these two genera (Swaegers *et*  
487 *al.*, 2014; Callahan & McPeck, 2016; Blow *et al.*, 2021).

488 Although body size was strongly sexually dimorphic in *I. elegans*, we did not find as pronounced  
489 sexual dimorphism in wing shape in neither this species nor *E. cyathigerum* (Fig. 3B). However,  
490 there was a clear overall species differences in wing shape, with *E. cyathigerum* having longer  
491 and more pointed wings compared to the shorter and more rounded wings in *I. elegans*. These  
492 species differences in wing shape might reflect different microhabitat use and mating system  
493 differences. As explained above, *I. elegans* mainly mate in the vegetation around ponds and



494 exhibits no postcopulatory mate guarding, *E. cyathigerum* mate more in the open areas and males  
495 remain attached to females during oviposition and when copulating pairs fly over water bodies  
496 (M. Tsuboi, H. Frietsch and E. Svensson, unpublished observations). More elongated wings in *E.*  
497 *cyathigerum* might reflect these more open habitat preferences, whereas the shorter and more  
498 rounded wings of *I. elegans* might instead reflect that mating largely takes place in vegetation  
499 and that males and females do not remain attached during oviposition with no postcopulatory  
500 mate guarding. Consistent with this interpretation, ecomorphological comparative studies of  
501 birds indicate that habitat structure is an important determinant of wing shape evolution, with  
502 species in more dense habitats having shorter and more rounded wings and species occupying  
503 more open habitats having longer and more pointed wings (Kennedy *et al.*, 2016). Our  
504 knowledge about the functional relationship between flight performance and wing shape in  
505 Odonata is more limited (Ellington, 1984; Bomphrey *et al.*, 2016) but if we assume that similar  
506 aerodynamic and ecological principles apply to damselfly wings as bird wings (Kennedy *et al.*,  
507 2016), these species differences in wing shape are broadly consistent with species differences in  
508 their microhabitats. Thus, the more open-dwelling *E. cyathigerum* has longer and narrower  
509 wings and the more vegetation-dwelling *I. elegans* having rounder and broader wings.

510

## 511 **Causes and consequences of divergence and convergence in adaptive landscape**

512

513 Females in both species experienced positive directional selection towards large body size  
514 although this fecundity selection is stronger in magnitude in *E. cyathigerum* than in *I. elegans*  
515 (Fig. 4; Table 1; Table 2; Table S5). Thus, the fitness benefits in terms of fecundity increased  
516 faster with female size in *E. cyathigerum* than in *I. elegans*. Intense male mating harassment in  
517 females of *I. elegans* compared to *E. cyathigerum* can potentially explain these species  
518 differences and this divergent selection on females, since male mating harassment in *I. elegans*  
519 has been shown to be mainly directed towards high-fecundity females (Gosden & Svensson,  
520 2009). In other insects such as *Drosophila*, large females have intrinsically higher fecundity but  
521 also suffer more from male mating attempts reducing this fitness advantage (Long *et al.*, 2009;  
522 Chenoweth *et al.*, 2015). In contrast, in *E. cyathigerum*, female fecundity benefits of large size  
523 might be less affected by male mating harassment that seems to be lower in this species  
524 compared to *I. elegans* based on several mating system indices. Lower proportion of  
525 androchrome females in *E. cyathigerum* than in *I. elegans* is particularly important here, as  
526 androchrome females in damselflies benefit from reduced male mating harassment as shown in  
527 many previous studies in the genus *Ischnura* (Robertson, 1985; Cordero *et al.*, 1998; Gosden &  
528 Svensson, 2009; Willink *et al.*, 2019; Blow *et al.*, 2021). Hence, a lower frequency of  
529 androchrome females in *E. cyathigerum* than in *I. elegans* is likely to reflect relaxed mating  
530 harassment and reduced sexual conflict in the former species. In addition, female *E. cyathigerum*  
531 are locally segregated from males of the same species, as previously documented in several other  
532 species of damselflies (Stoks, 2001; Steele *et al.*, 2011), whereas in *I. elegans*, males and females  
533 typically occur in sympatry, and sex ratios are more even in this species (Fig. 2C). Sexual habitat  
534 segregation might therefore further release females of *E. cyathigerum* from the cost of male  
535 mating harassment, enabling them to enjoy greater fecundity advantages of large body size  
536 compared to *I. elegans*. Taken together, female body size in *E. cyathigerum* and *I. elegans* is  
537 subject to directional selection towards larger size and this fecundity selection is significantly  
538 stronger in the former species.



539 Compared to females, selection on male body size was erratic. We found divergent patterns of  
540 selection between the two species where *I. elegans* is characterized by a weak (non-significant)  
541 stabilizing selection while *E. cyathigerum* is under a disruptive selection. However, when  
542 correlational selection between wing shape and body size were considered, there was instead an  
543 indication of negative directional selection towards small body size in *E. cyathigerum*. We  
544 interpret these results as indicating that sexual selection on male body size is highly context  
545 dependent in these pond damselflies. Previous studies have shown that the form and magnitude  
546 of sexual selection in damselflies can vary in a fine spatial and temporal scale depending on local  
547 community structure, such as density of female color morph (Gosden & Svensson, 2008) or  
548 phenotypic distribution of male and female body sizes (Steele *et al.*, 2011).

549 Selection on wing shape in these two species differed somewhat depending on if fore- or  
550 hindwing were considered, but in general it was stabilizing (Fig. 4). All three significant  
551 quadratic selection estimates were negative in sign and six out of the total eight estimates were  
552 negative (Fig. 4; Table 2). This indicates that wing shape is under stabilizing selection both in  
553 terms of sexual selection in males and fecundity selection in females. One interpretation is that  
554 wing shape is currently maintained around some optimum shared by both sexes within a species  
555 but with the two species occupying different adaptive peaks. An alternative interpretation is that  
556 these species occupy the same peak of a macroevolutionary adaptive landscape in which the two  
557 species resides at different locations of the peak depending on their phenotypic values. Our  
558 results are in favor of the latter scenario. Selection estimates revealed that, among eight estimates  
559 of directional selection gradient ( $\beta$ ) we evaluated,  $\beta$  of *E. cyathigerum* were all positive in sign  
560 and  $\beta$  of *I. elegans* were all negative in sign (Table 1). Based on the difference in wing shape  
561 between *E. cyathigerum* and *I. elegans* (Fig. 2), these estimates can be interpreted as convergent  
562 selection towards an intermediate wing shape of the two species. It is conceivable that the  
563 intermediate wing phenotype represents a global adaptive optimum that characterizes  
564 fundamental mechanical and physiological demands of flight, that would constitute the primary  
565 optimum (*sensu* Hansen, 1997), within which each species occupy a subset of this global optima  
566 depending on species-specific ecological niches that collectively form the adaptive zone (*sensu*  
567 Simpson, 1944).

568 That selection on wing shape was largely stabilizing in both species and thus convergent  
569 contrasts markedly with selection on body size that was directional in females and weaker but  
570 more variable in males. One implication of the different modes of selection on these two traits is  
571 that we would expect wing shape to evolve more slowly over macroevolutionary time scales  
572 compared to body size. Our data support this expectation because body size is clearly different  
573 between *I. elegans* and *E. cyathigerum* while the difference in wing shape between the two  
574 species is much modest, which is in fact smaller than the difference between fore- and hindwing  
575 of a single individual (Fig. 3, Fig. S4). More generally, wing morphology of insects, particularly  
576 that of Dipterans has been put forward as an example of macroevolutionary stasis (Hansen &  
577 Houle, 2004; Houle *et al.*, 2017). Our findings are thus consistent with the idea that the  
578 macroevolutionary stasis reflects the stability of macroevolutionary adaptive landscape (Estes &  
579 Arnold, 2007; Uyeda *et al.*, 2011). We further note that females of *E. cyathigerum* experience  
580 stronger directional selection towards large body size than females of *I. elegans*, and *E.*  
581 *cyathigerum* also happens to be the larger species of the two (Fig. 3A, Fig. S2). Thus, the current  
582 species difference in size is the same as would be expected if such directional selections have  
583 persisted over macroevolutionary time scales. These findings suggest that selection gradients

584 measured at contemporary populations may have an implication for macroevolutionary  
585 phenomena, at least when compared species share large fraction of their ecological niches.

586

## 587 **Conclusions**

588

589 This comparative selection study of two phenotypically and ecologically similar damselfly  
590 species have revealed both shared and unique aspects of the adaptive landscapes of two key  
591 traits: body size and wing shape. Broadly speaking, body size is subject to stronger and more  
592 variable selection than wing shape. We interpret this as partly reflecting sex-specific selection  
593 but also a result of species differences in mating systems and different degree of sexual conflict  
594 through male mating harassment on females. In contrast, wing shape seems largely to experience  
595 a similar mode of stabilizing selection in both species that is concordant between the sexes and  
596 may result in convergent evolution in wing shape of the two species. This may indicate closely  
597 located fitness optima of these two species reside within an adaptive zone of a shared  
598 macroevolutionary adaptive landscape that has been stable for millions of years. These species-  
599 specific optima of wing shape are likely to reflect structural and physical differences in the  
600 microhabitats of these two species. We suggest that both these physical microenvironmental  
601 differences but also social and mating system differences between these two phenotypically  
602 similar species can explain some of the differences in the adaptive landscapes in these two  
603 ecologically similar species. These damselfly species and most other organisms are therefore not  
604 solely passive objects of selection, but they also shape the selection pressures on themselves  
605 (Lewontin, 1983). Results in this study suggest that some aspects of the selection on phenotypic  
606 traits in these two ecologically similar species arise from intrinsic mating system differences,  
607 which could be a potential example of social niche construction (Saltz *et al.*, 2016) and more  
608 broadly illustrate the reciprocal interactions and feedbacks between organisms and their  
609 environments (Odling-Smee *et al.*, 2003).

610 References

- 611
- 612 Anholt, B.R. 1991. Measuring selection on a population of damselflies with a manipulated  
613 phenotype. *Evolution (N. Y.)* **45**: 1091–1106. Wiley Online Library.
- 614 Arnold, S.J., Pfrender, M.E. & Jones, A.G. 2001. The adaptive landscape as a conceptual bridge  
615 between micro- and macroevolution. *Genetica* **112–113**: 9–32.
- 616 Arnold, S.J. & Wade, M.J. 1984. On the measurement of natural and sexual selection: theory.  
617 *Evolution (N. Y.)* **38**: 709–719.
- 618 Arnqvist, G. 1992. Spatial variation in selective regimes: sexual selection in the water strider,  
619 *Gerris odontogaster*. *Evolution (N. Y.)* **46**: 914–929.
- 620 Bates, D., Maechler, M., Bolker, B.M. & Walker, S. 2015. Fitting linear mixed-effects models  
621 using lme4. *Journal of Statistical Software* **67**: 1–48.
- 622 Blow, R., Willink, B. & Svensson, E.I. 2021. A molecular phylogeny of forktail damselflies  
623 (genus *Ischnura*) reveals a dynamic macroevolutionary history of female colour  
624 polymorphisms. *Mol. Phylogenet. Evol.* **160**: 107134. Elsevier.
- 625 Blows, M.W. 2007. A tale of two matrices: multivariate approaches in evolutionary biology. *J.*  
626 *Evol. Biol.* **20**: 1–8. Wiley Online Library.
- 627 Blows, M.W. & Brooks, R. 2003. Measuring nonlinear selection. *Am. Nat.* **162**: 815–820. The  
628 University of Chicago Press.
- 629 Blows, M.W., Chenoweth, S.F. & Hine, E. 2004. Orientation of the genetic variance-covariance  
630 matrix and the fitness surface for multiple male sexually selected traits. *Am. Nat.* **163**: 329–  
631 340. The University of Chicago Press.
- 632 Bomphrey, R.J., Nakata, T., Henningsson, P. & Lin, H.T. 2016. Flight of the dragonflies and  
633 damselflies. *Philos. Trans. R. Soc. B Biol. Sci.* **371**.
- 634 Bonduriansky, R. 2001. The evolution of male mate choice in insects: A synthesis of ideas and  
635 evidence. *Biol. Rev. Camb. Philos. Soc.* **76**: 305–339.
- 636 Brodie, E.D., Moore, A.J. & Janzen, F.J. 1995. Visualizing and quantifying natural selection.  
637 *Trends Ecol. Evol.* **10**: 313–318.
- 638 Brown, C.R. & Brown, M.B. 2013. Where has all the road kill gone? *Curr. Biol.* **23**: R233–  
639 R234. Elsevier.
- 640 Bumpus, H.C. 1899. The elimination of the unfit as illustrated by the introduced House Sparrow  
641 *Passer domesticus*. *Biological Lectures. Mar. Biol. Lab. Woods Hole* 209–226.
- 642 Callahan, M.S. & McPeck, M.A. 2016. Multi-locus phylogeny and divergence time estimates of  
643 *Enallagma* damselflies (Odonata: Coenagrionidae). *Mol. Phylogenet. Evol.* **94**: 182–195.  
644 Elsevier Inc.
- 645 Chenoweth, S.F., Appleton, N.C., Allen, S.L. & Rundle, H.D. 2015. Genomic Evidence that  
646 Sexual Selection Impedes Adaptation to a Novel Environment. *Curr. Biol.* **25**: 1860–1866.  
647 Elsevier Ltd.
- 648 Chenoweth, S.F., Hunt, J. & Rundle, H.D. 2012. Analyzing and comparing the geometry of  
649 individual fitness surfaces. *Adapt. Landsc. Evol. Biol.* 126–149. Oxford University Press  
650 Oxford, UK.
- 651 Chevin, L. & Lande, R. 2015. Evolution of environmental cues for phenotypic plasticity.  
652 *Evolution (N. Y.)* **69**: 2767–2775. Wiley Online Library.
- 653 Corbet, P.S. 1999. *Dragonflies: behaviour and ecology of Odonata*. Harley books.
- 654 Cordero, A., Carbone, S.S. & Utzeri, C. 1998. Mating opportunities and mating costs are reduced  
655 in androchrome female damselflies, *Ischnura elegans* (Odonata). *Anim. Behav.* **55**: 185–197.

- 656 Elsevier.
- 657 De Lisle, S.P. & Svensson, E.I. 2017. On the standardization of fitness and traits in comparative  
658 studies of phenotypic selection. *Evolution (N. Y.)*. **71**: 2313–2326.
- 659 De Villemereuil, P., Charmantier, A., Arlt, D., Bize, P., Brekke, P., Brouwer, L., *et al.* 2020.  
660 Fluctuating optimum and temporally variable selection on breeding date in birds and  
661 mammals. *Proc. Natl. Acad. Sci.* **117**: 31969–31978. National Acad Sciences.
- 662 Dickinson, M.H., Lehmann, F.-O. & Sane, S.P. 1999. Wing rotation and the aerodynamic basis  
663 of insect flight. *Science (80-. )*. **284**: 1954–1960. American Association for the  
664 Advancement of Science.
- 665 Dingemanse, N.J., Araya-Ajoy, Y.G. & Westneat, D.F. 2021. Most published selection gradients  
666 are underestimated: Why this is and how to fix it. *Evolution (N. Y.)*. **75**: 806–818. Wiley  
667 Online Library.
- 668 Dudaniec, R.Y., Carey, A.R., Svensson, E.I., Hansson, B., Yong, C.J. & Lancaster, L.T. 2022.  
669 Latitudinal clines in sexual selection, sexual size dimorphism and sex-specific genetic  
670 dispersal during a poleward range expansion. *J. Anim. Ecol.* **91**: 1104–1118. Wiley Online  
671 Library.
- 672 Ellington, C.P. 1984. The aerodynamics of hovering insect flight. II. Morphological parameters.  
673 *Philos. Trans. R. Soc. London. B, Biol. Sci.* **305**: 17–40. The Royal Society London.
- 674 Endler, J.A. 1986. *Natural selection in the wild*. Princeton University Press.
- 675 Estes, S. & Arnold, S.J. 2007. Resolving the paradox of stasis: models with stabilizing selection  
676 explain evolutionary divergence on all timescales. *Am. Nat.* **169**: 227–244. The University  
677 of Chicago Press.
- 678 Gering, E.J. 2017. Male-mimicking females increase male-male interactions, and decrease male  
679 survival and condition in a female-polymorphic damselfly. *Evolution (N. Y.)*. **71**: 1390–  
680 1396. Wiley Online Library.
- 681 Gosden, T.P. & Svensson, E.I. 2009. Density-dependent male mating harassment, female  
682 resistance, and male mimicry. *Am. Nat.* **173**: 709–721. The University of Chicago Press.
- 683 Gosden, T.P. & Svensson, E.I. 2008. Spatial and temporal dynamics in a sexual selection mosaic.  
684 *Evolution (N. Y.)*. **62**: 845–856.
- 685 Hansen, T.F. 1997. Stabilizing selection and the comparative analysis of adaptation. *Evolution*  
686 *(N. Y.)*. **51**: 1341–1351. Wiley Online Library.
- 687 Hansen, T.F. 2014. Use and misuse of comparative methods in the study of adaptation. In:  
688 *Modern phylogenetic comparative methods and their application in evolutionary biology*,  
689 pp. 351–379. Springer.
- 690 Hansen, T.F. & Houle, D. 2004. Evolvability, Stabilizing. *Phenotypic Integr. Stud. Ecol. Evol.*  
691 *complex phenotypes* 130. Oxford University Press.
- 692 Hereford, J., Hansen, T.F. & Houle, D. 2004. Comparing strengths of directional selection: how  
693 strong is strong? *Evolution (N. Y.)*. **58**: 2133–2143. Wiley Online Library.
- 694 Houle, D., Bolstad, G.H., van der Linde, K. & Hansen, T.F. 2017. Mutation predicts 40 million  
695 years of fly wing evolution. *Nature* **548**: 447–450. Nature Publishing Group.
- 696 Kennedy, J.D., Borregaard, M.K., Jönsson, K.A., Marki, P.Z., Fjeldså, J. & Rahbek, C. 2016.  
697 The influence of wing morphology upon the dispersal, geographical distributions and  
698 diversification of the Corvidae (Aves; Passeriformes). *Proc. R. Soc. B Biol. Sci.* **283**:  
699 20161922. The Royal Society.
- 700 Kingsolver, J.G. & Diamond, S.E. 2011. Phenotypic selection in natural populations: what limits  
701 directional selection? *Am. Nat.* **177**: 346–357. University of Chicago Press Chicago, IL.

- 702 Kingsolver, J.G., Hoekstra, H.E., Hoekstra, J.M., Berrigan, D., Vignieri, S.N., Hill, C.E., *et al.*  
703 2001. The strength of phenotypic selection in natural populations. *Am. Nat.* **157**: 245–261.  
704 The University of Chicago Press.
- 705 Kingsolver, J.G. & Schemske, D.W. 1991. Path analyses of selection. *Trends Ecol. Evol.* **6**: 276–  
706 280. Elsevier.
- 707 Kuchta, S.R. & Svensson, E.I. 2014. Predator-mediated natural selection on the wings of the  
708 damselfly *Calopteryx splendens*: Differences in selection among trait types. *Am. Nat.* **184**:  
709 91–109.
- 710 Lande, R. 1976. Natural selection and random genetic drift in phenotypic evolution. *Evolution*  
711 (*N. Y.*) 314–334. JSTOR.
- 712 Lande, R. & Arnold, S.J. 1983. The Measurement of Selection on Correlated Characters.  
713 *Evolution (N. Y.)* **37**: 1210.
- 714 Le Rouzic, A., Hansen, T.F., Gosden, T.P. & Svensson, E.I. 2015. Evolutionary time-series  
715 analysis reveals the signature of frequency-dependent selection on a female mating  
716 polymorphism. *Am. Nat.* **185**: E182–E196.
- 717 Lewontin, R.C. 1983. Biological determinism. *Tann. Lect. Hum. Values* **4**: 147–183.
- 718 Long, T.A.F., Pischedda, A., Stewart, A.D. & Rice, W.R. 2009. A cost of sexual attractiveness to  
719 high-fitness females. *PLoS Biol.* **7**.
- 720 MacColl, A.D.C. 2011. The ecological causes of evolution. *Trends Ecol. Evol.* **26**: 514–522.  
721 Elsevier.
- 722 McCauley, D.E. & Wade, M.J. 1978. Female choice and the mating structure of a natural  
723 population of the soldier beetle, *Chauliognathus pennsylvanicus*. *Evolution (N. Y.)* **32**: 771–  
724 775. JSTOR.
- 725 McPeck, M.A. & Brown, J.M. 2000. Building a regional species pool: diversification of the  
726 *Enallagma* damselflies in eastern North America. *Ecology* **81**: 904–920. Wiley Online  
727 Library.
- 728 McPeck, M.A., Shen, L. & Farid, H. 2009. The correlated evolution of three-dimensional  
729 reproductive structures between male and female damselflies. *Evolution (N. Y.)* **63**: 73–83.
- 730 McPeck, M.A., Shen, L., Torrey, J.Z. & Farid, H. 2008. The tempo and mode of three-  
731 dimensional morphological evolution in male reproductive structures. *Am. Nat.* **171**.
- 732 McPeck, M.A., Symes, L.B., Zong, D.M. & McPeck, C.L. 2011. Species recognition and  
733 patterns of population variation in the reproductive structures of a damselfly genus. *Evol.*  
734 *Int. J. Org. Evol.* **65**: 419–428. Wiley Online Library.
- 735 Mitchell-Olds, T. & Shaw, R.G. 1987. Regression analysis of natural selection: statistical  
736 inference and biological interpretation. *Evolution (N. Y.)* **41**: 1149–1161. Wiley Online  
737 Library.
- 738 Morrissey, M.B. & Hadfield, J.D. 2012. Directional selection in temporally replicated studies is  
739 remarkably consistent. *Evolution (N. Y.)* **66**: 435–442.
- 740 Nishida, T. 1994. Spatio-temporal variation of natural and sexual selection in breeding  
741 populations of the coreid bug, *Colpula lativentris* (Heteroptera: Coreidae). *Res. Popul. Ecol.*  
742 (*Kyoto*). **36**: 209–218. Springer.
- 743 Odling-Smee, F.J., Laland, K.N., Feldman, M.W. & Keller, L. 2003. Autumn books-Niche  
744 Construction: The Neglected Process in Evolution. *Nature* **425**: 769. [London: Macmillan  
745 Journals], 1869-.
- 746 Opedal, Ø. 2021. A functional view reveals substantial predictability of pollinator-mediated  
747 selection. *J. Pollinat. Ecol.* **30**: 273–288.



- 748 Outomuro, D., Söderquist, L., Nilsson-Örtman, V., Cortázar-Chinarro, M., Lundgren, C. &  
749 Johansson, F. 2016. Antagonistic natural and sexual selection on wing shape in a  
750 scrambling damselfly. *Evolution* **70**: 1582–1595.
- 751 Phillips, P.C. & Arnold, S.J. 1989. Visualizing multivariate selection. *Evolution (N. Y.)*. **43**:  
752 1209–1222. Wiley Online Library.
- 753 Porto, A. & Voje, K.L. 2020. ML-morph: A fast, accurate and general approach for automated  
754 detection and landmarking of biological structures in images. *Methods Ecol. Evol.* **11**: 500–  
755 512.
- 756 Punzalan, D., Rodd, F.H. & Rowe, L. 2010. Temporally variable multivariate sexual selection on  
757 sexually dimorphic traits in a wild insect population. *Am. Nat.* **175**: 401–414. The  
758 University of Chicago Press.
- 759 Rausher, M.D. 1992. The measurement of selection on quantitative traits: biases due to  
760 environmental covariances between traits and fitness. *Evolution (N. Y.)*. **46**: 616–626. Wiley  
761 Online Library.
- 762 Robertson, H.M. 1985. Female dimorphism and mating behaviour in a damselfly, *Ischnura*  
763 *ramburi*: females mimicking males. *Anim. Behav.* **33**: 805–809. Elsevier.
- 764 Saltz, J.B., Geiger, A.P., Anderson, R., Johnson, B. & Marren, R. 2016. What , if anything , is a  
765 social niche ? *Evol. Ecol.* **30**: 349–364. Springer International Publishing.
- 766 Schindelin, J., Arganda-Carreras, I., Frise, E., Kaynig, V., Longair, M., Pietzsch, T., *et al.* 2012.  
767 Fiji: An open-source platform for biological-image analysis. *Nat. Methods* **9**: 676–682.
- 768 Schluter, D. 1996. Adaptive radiation along genetic lines of least resistance. *Evolution (N. Y.)*. **50**:  
769 1766–1774. Wiley Online Library.
- 770 Schluter, D. 1988. Estimating the form of natural selection on a quantitative trait. *Evolution (N.*  
771 *Y.)*. **42**: 849–861. Wiley Online Library.
- 772 Schluter, D. & Nychka, D. 1994. Exploring fitness surfaces. *Am. Nat.* **143**: 597–616. University  
773 of Chicago Press.
- 774 Siepielski, A.M., Dibattista, J.D. & Carlson, S.M. 2009. It’s about time: The temporal dynamics  
775 of phenotypic selection in the wild. *Ecol. Lett.* **12**: 1261–1276.
- 776 Siepielski, A.M., DiBattista, J.D., Evans, J.A. & Carlson, S.M. 2011. Differences in the temporal  
777 dynamics of phenotypic selection among fitness components in the wild. *Proc. R. Soc. B*  
778 *Biol. Sci.* **278**: 1572–1580.
- 779 Siepielski, A.M., Gotanda, K.M., Morrissey, M.B., Diamond, S.E., DiBattista, J.D. & Carlson,  
780 S.M. 2013. The spatial patterns of directional phenotypic selection. *Ecol. Lett.* **16**: 1382–  
781 1392. Wiley Online Library.
- 782 Siepielski, A.M., Hung, K.-L., Bein, E.E.B. & McPeck, M.A. 2010. Experimental evidence for  
783 neutral community dynamics governing an insect assemblage. *Ecology* **91**: 847–857. Wiley  
784 Online Library.
- 785 Siepielski, A.M., Morrissey, M.B., Buoro, M., Carlson, S.M., Caruso, C.M., Clegg, S.M., *et al.*  
786 2017. Precipitation drives global variation in natural selection. *Science (80-. )*. **355**: 959–  
787 962. American Association for the Advancement of Science.
- 788 Simpson, G.G. 1944. *Tempo and Mode in Evolution*. Columbia University Press, New York.
- 789 Sinervo, B. & Basolo, A. 1996. Testing adaptation using phenotypic manipulation.  
790 In 'Adaptation.' (Eds MR Rose, GV Lauder.) pp. 149-185. Academic Press: London.
- 791 Sinervo, B., Zamudio, K., Doughty, P. & Huey, R.B. 1992. Allometric engineering: a causal  
792 analysis of natural selection on offspring size. *Science (80-. )*. **258**: 1927–1930. American  
793 Association for the Advancement of Science.

- 794 Smallshire, D. & Swash, A. 2020. *Europe's Dragonflies - A field guide to the damselflies and*  
795 *dragonflies*.
- 796 Sokolovska, N., Rowe, L. & Johansson, F. 2000. Fitness and body size in mature odonates. *Ecol.*  
797 *Entomol.* **25**: 239–248. Wiley Online Library.
- 798 Steele, D.B., Siepielski, A.M. & Mcpeek, M.A. 2011. Sexual selection and temporal phenotypic  
799 variation in a damselfly population. *J. Evol. Biol.* **24**: 1517–1532.
- 800 Stinchcombe, J.R., Agrawal, A.F., Hohenlohe, P.A., Arnold, S.J. & Blows, M.W. 2008.  
801 Estimating nonlinear selection gradients using quadratic regression coefficients: Double or  
802 nothing? *Evolution (N. Y.)*. **62**: 2435–2440.
- 803 Stinchcombe, J.R., Rutter, M.T., Burdick, D.S., Tiffin, P., Rausher, M.D. & Mauricio, R. 2002.  
804 Testing for environmentally induced bias in phenotypic estimates of natural selection:  
805 theory and practice. *Am. Nat.* **160**: 511–523. The University of Chicago Press.
- 806 Stoks, R. 2001. What causes male-biased sex ratios in mature damselfly populations? *Ecol.*  
807 *Entomol.* **26**: 188–197. Wiley Online Library.
- 808 Svensson, E. & Calsbeek, R. 2012. *The adaptive landscape in evolutionary biology*. OUP  
809 Oxford.
- 810 Svensson, E. & Sinervo, B. 2000. Experimental excursions on adaptive landscapes:  
811 density-dependent selection on egg size. *Evolution (N. Y.)*. **54**: 1396–1403. Wiley Online  
812 Library.
- 813 Svensson, E.I. & Abbott, J. 2005. Evolutionary dynamics and population biology of a  
814 polymorphic insect. *J. Evol. Biol.* **18**: 1503–1514.
- 815 Svensson, E.I., Abbott, J. & Härdling, R. 2005. Female polymorphism, frequency dependence,  
816 and rapid evolutionary dynamics in natural populations. *Am. Nat.* **165**: 567–576. The  
817 University of Chicago Press.
- 818 Svensson, E.I., Arnold, S.J., Bürger, R., Csilléry, K., Draghi, J., Henshaw, J.M., *et al.* 2021.  
819 Correlational selection in the age of genomics. *Nat. Ecol. Evol.* **5**: 562–573. Springer US.
- 820 Svensson, E.I., Karlsson, K., Friberg, M. & Eroukhmanoff, F. 2007. Gender Differences in  
821 Species Recognition and the Evolution of Asymmetric Sexual Isolation. *Curr. Biol.* **17**:  
822 1943–1947.
- 823 Svensson, E.I., Willink, B., Duryea, M.C. & Lancaster, L.T. 2020. Temperature drives pre-  
824 reproductive selection and shapes the biogeography of a female polymorphism. *Ecol. Lett.*  
825 **23**: 149–159.
- 826 Swaegers, J., Janssens, S.B., Ferreira, S., Watts, P.C., Mergeay, J., McPeck, M.A., *et al.* 2014.  
827 Ecological and evolutionary drivers of range size in *C oenagrion* damselflies. *J. Evol. Biol.*  
828 **27**: 2386–2395. Wiley Online Library.
- 829 Takahashi, Y., Kagawa, K., Svensson, E.I. & Kawata, M. 2014. Evolution of increased  
830 phenotypic diversity enhances population performance by reducing sexual harassment in  
831 damselflies. *Nat. Commun.* **5**: 1–7. Nature Publishing Group.
- 832 Takahashi, Y. & Watanabe, M. 2010. Female reproductive success is affected by selective male  
833 harassment in the damselfly *Ischnura senegalensis*. *Anim. Behav.* **79**: 211–216. Elsevier.
- 834 Templin, R.J. 2000. The spectrum of animal flight: insects to pterosaurs. *Prog. Aerosp. Sci.* **36**:  
835 393–436. Elsevier.
- 836 Uyeda, J.C., Hansen, T.F., Arnold, S.J. & Pienaar, J. 2011. The million-year wait for  
837 macroevolutionary bursts. *Proc. Natl. Acad. Sci.* **108**: 15908–15913. National Acad  
838 Sciences.
- 839 Wade, M.J. & Kalisz, S. 1990. The causes of natural selection. *Evolution (N. Y.)*. **44**: 1947–1955.

- 840 Waller, J. & Svensson, E.I. 2016. The measurement of selection when detection is imperfect:  
841 How good are naive methods? *Methods Ecol. Evol.* **7**: 538–548. Wiley Online Library.
- 842 Waller, J.T. & Svensson, E.I. 2017. Body size evolution in an old insect order: no evidence for  
843 Cope’s Rule in spite of fitness benefits of large size. *Evolution (N. Y.)*. **71**: 2178–2193.  
844 Wiley Online Library.
- 845 Walsh, B. & Blows, M.W. 2009. Abundant genetic variation+ strong selection= multivariate  
846 genetic constraints: a geometric view of adaptation. *Annu. Rev. Ecol. Evol. Syst.* **40**: 41.
- 847 Willink, B., Duryea, M.C. & Svensson, E.I. 2019. Macroevolutionary origin and adaptive  
848 function of a polymorphic female signal involved in sexual conflict. *Am. Nat.* **194**: 707–  
849 724. The University of Chicago Press Chicago, IL.
- 850 Willink, B., Duryea, M.C., Wheat, C. & Svensson, E.I. 2020. Changes in gene expression during  
851 female reproductive development in a color polymorphic insect. *Evolution (N. Y.)*. **74**: 1063–  
852 1081.
- 853 Wright, S. 1932. The roles of mutation, inbreeding, crossbreeding, and selection in evolution.
- 854 Young, K. V, Brodie Jr, E.D. & Brodie III, E.D. 2004. How the horned lizard got its horns.  
855 *Science (80-. )*. **304**: 65. American Association for the Advancement of Science.
- 856

857 Table 1: Mean-standardized linear ( $\beta$ ) and quadratic ( $\gamma$ ) selection gradients for body size (PC1), and wing shape (LD1) to complement  
858 Figure 4. Estimates within square brackets “[ ]” are variance-standardized selection gradients. Estimates that are statistically  
859 significantly different from 0 at a significance level of  $p < 0.05$  are shown in **bold**. All estimates are obtained from mixed-effect  
860 models that include sampled location as a random effect.

| Trait                     | Sex | $\beta \pm SE$                                                            |                                                                           | $\gamma \pm SE$                                                          |                                                                       |
|---------------------------|-----|---------------------------------------------------------------------------|---------------------------------------------------------------------------|--------------------------------------------------------------------------|-----------------------------------------------------------------------|
|                           |     | <i>I. elegans</i>                                                         | <i>E. cyathigerum</i>                                                     | <i>I. elegans</i>                                                        | <i>E. cyathigerum</i>                                                 |
| Body size PC1             | ♂   | 0.053±0.200<br>[0.008±0.032]                                              | -0.036±0.388<br>[-0.003±0.036]                                            | -3.234±2.026<br>[-0.082±0.052]                                           | <b>5.551±2.726<sup>(*)</sup></b><br><b>[0.094±0.046<sup>(*)</sup></b> |
|                           | ♀   | <b>1.569±0.295<sup>(***)</sup></b><br><b>[0.222±0.042<sup>(***)</sup></b> | <b>4.138±0.545<sup>(***)</sup></b><br><b>[0.415±0.055<sup>(***)</sup></b> | -3.761±3.275<br>[-0.076±0.066]                                           | -5.578±6.698<br>[-0.056±0.067]                                        |
| Wing shape LD1 (forewing) | ♂   | -0.018±0.036<br>[-0.015±0.032]                                            | 0.080±0.057<br>[0.050±0.036]                                              | <b>-0.057±0.027<sup>(*)</sup></b><br><b>[-0.064±0.025<sup>(*)</sup></b>  | 0.133±0.109<br>[0.049±0.046]                                          |
|                           | ♀   | <b>-0.112±0.050<sup>(*)</sup></b><br><b>[-0.094±0.042<sup>(*)</sup></b>   | 0.137±0.091<br>[0.086±0.057]                                              | <b>-0.090±0.041<sup>(*)</sup></b><br>[-0.074±0.039]                      | 0.145±0.145<br>[0.054±0.064]                                          |
| Wing shape LD1 (hindwing) | ♂   | -0.051±0.036<br>[-0.045±0.032]                                            | 0.046±0.054<br>[0.030±0.036]                                              | <b>-0.052±0.025<sup>(*)</sup></b><br><b>[-0.065±0.024<sup>(**)</sup></b> | -0.145±0.087<br>[-0.056±0.047]                                        |
|                           | ♀   | -0.063±0.050<br>[-0.052±0.042]                                            | <b>0.194±0.094<sup>(*)</sup></b><br><b>[0.118±0.057<sup>(*)</sup></b>     | -0.071±0.036<br>[-0.064±0.036]                                           | -0.137±0.186<br>[-0.059±0.074]                                        |

861 Note: \* indicates  $0.01 < p < 0.05$ , \*\* indicates  $0.001 < P < 0.01$ , \*\*\* indicates  $p < 0.001$ .  
862

863 Table 2: Mean-standardized linear ( $\beta$ ) and quadratic ( $\gamma$ ) selection gradients of body size (PC1), and wing shape (LD1) that  
864 characterizes multivariate selection surfaces shown in Figure 5. Estimates that are statistically significantly different from 0 at a  
865 significance level of  $p < 0.05$  are shown in **bold**. All estimates are obtained from mixed-effect models that include sampled location as  
866 a random effect.

| Sex | Parameters                  | estimates $\pm$ SE (forewing)                    |                                                  | estimates $\pm$ SE (hindwing)                    |                                                  |
|-----|-----------------------------|--------------------------------------------------|--------------------------------------------------|--------------------------------------------------|--------------------------------------------------|
|     |                             | <i>I. elegans</i>                                | <i>E. cyathigerum</i>                            | <i>I. elegans</i>                                | <i>E. cyathigerum</i>                            |
| ♂   | (intercept)                 | 0.954 $\pm$ 0.226                                | 2.512 $\pm$ 0.546                                | 0.964 $\pm$ 0.239                                | 1.292 $\pm$ 0.544                                |
|     | Wing shape LD1              | 0.015 $\pm$ 0.083                                | 0.618 $\pm$ 0.318                                | -0.005 $\pm$ 0.079                               | -0.223 $\pm$ 0.277                               |
|     | Wing shape LD1 <sup>2</sup> | -0.067 $\pm$ 0.037                               | 0.089 $\pm$ 0.112                                | -0.052 $\pm$ 0.033                               | -0.159 $\pm$ 0.088                               |
|     | Body size PC1               | -0.861 $\pm$ 0.907                               | <b>-5.335<math>\pm</math>2.104<sup>(*)</sup></b> | -1.069 $\pm$ 0.944                               | <b>-4.476<math>\pm</math>2.119<sup>(*)</sup></b> |
|     | Body size PC1 <sup>2</sup>  | -3.272 $\pm$ 2.234                               | 8.632 $\pm$ 5.592                                | -3.146 $\pm$ 2.130                               | 10.056 $\pm$ 5.482                               |
|     | LD1 $\times$ PC1            | -0.172 $\pm$ 0.285                               | -1.224 $\pm$ 0.661                               | -0.071 $\pm$ 0.268                               | -0.740 $\pm$ 0.619                               |
| ♀   | (intercept)                 | 1.069 $\pm$ 0.117                                | -0.377 $\pm$ 0.998                               | 0.963 $\pm$ 0.129                                | -0.442 $\pm$ 0.929                               |
|     | Wing shape LD1              | 0.101 $\pm$ 0.082                                | 0.492 $\pm$ 0.468                                | 0.144 $\pm$ 0.078                                | 0.245 $\pm$ 0.509                                |
|     | Wing shape LD1 <sup>2</sup> | <b>-0.096<math>\pm</math>0.048<sup>(*)</sup></b> | 0.166 $\pm$ 0.140                                | <b>-0.079<math>\pm</math>0.040<sup>(*)</sup></b> | -0.015 $\pm$ 0.184                               |
|     | Body size PC1               | <b>2.109<math>\pm</math>0.883<sup>(*)</sup></b>  | <b>7.006<math>\pm</math>3.077<sup>(*)</sup></b>  | <b>2.482<math>\pm</math>0.907<sup>(**)</sup></b> | <b>6.212<math>\pm</math>2.980<sup>(*)</sup></b>  |
|     | Body size PC1 <sup>2</sup>  | -3.995 $\pm$ 3.704                               | -4.892 $\pm$ 6.815                               | -4.759 $\pm$ 3.558                               | -5.791 $\pm$ 6.846                               |
|     | LD1 $\times$ PC1            | -0.381 $\pm$ 0.436                               | 0.408 $\pm$ 0.867                                | -0.469 $\pm$ 0.401                               | -0.036 $\pm$ 0.875                               |

867  
868 Note: \* indicates  $0.01 < p < 0.05$ , \*\* indicates  $0.001 < P < 0.01$ , \*\*\* indicates  $p < 0.001$ .

869  
870  
871



Main Figures:

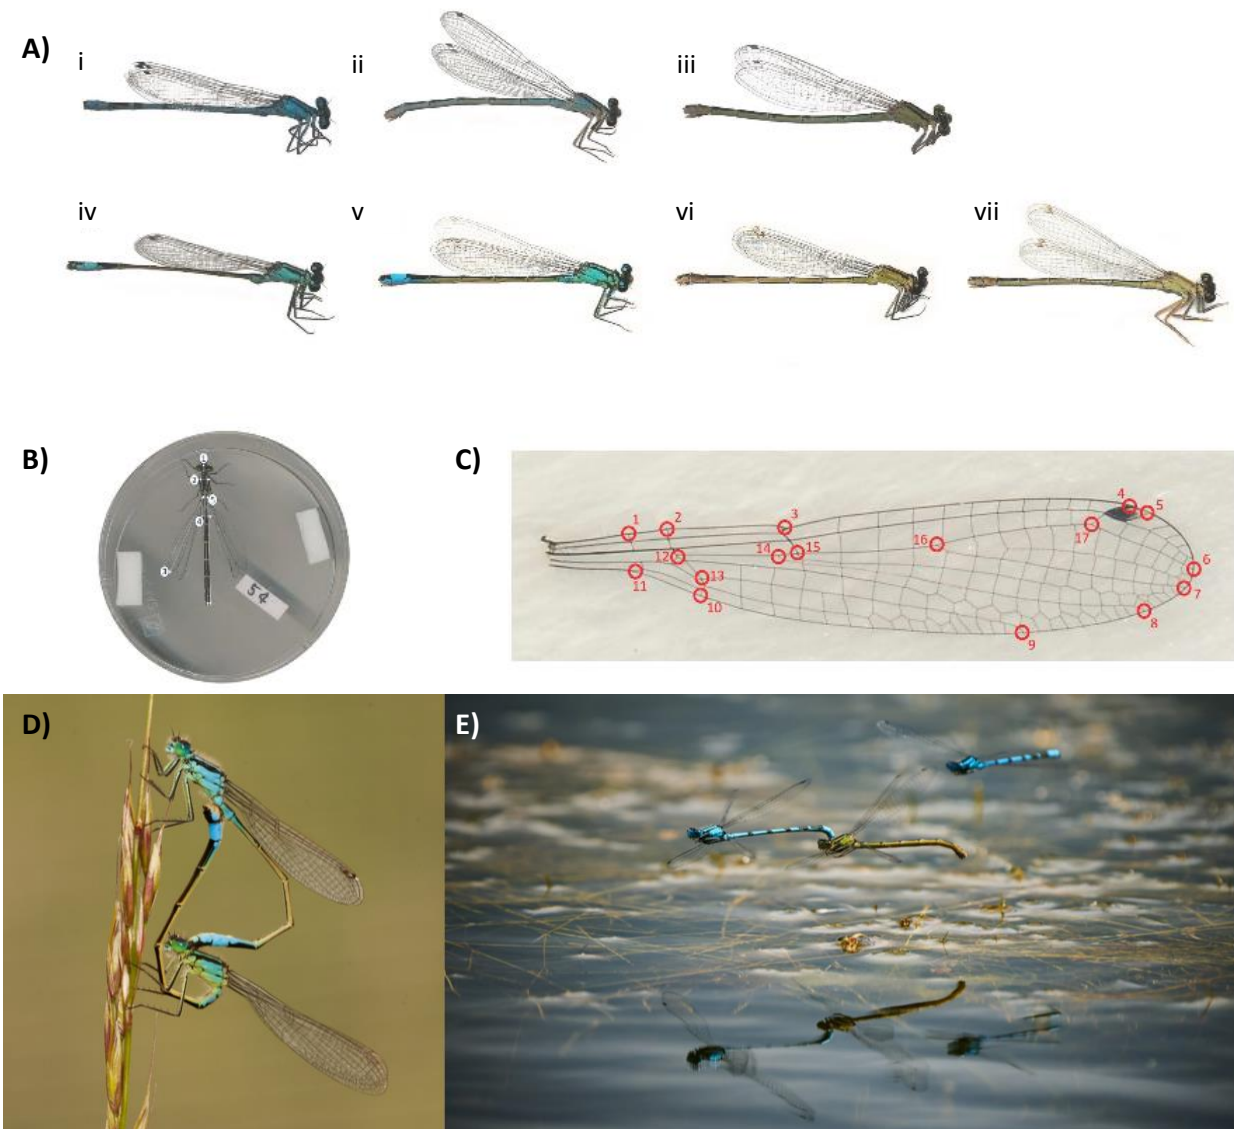

Figure 1: A) Males and female phenotypes and different color morphs in *E. cyathigerum* (i to iii) and *I. elegans* (iv to vii). Each subpanel shows an image of the following phenotype: males (i, iv), androchrome female (ii, v), gynochrome female (iii), infuscans female (vi), *infuscans-obsolata* female (vii). Note that in both *E. cyathigerum* and *I. elegans* there is a male-mimicking female morph (androchrome females) but in former species there is only one gynochrome color morph, whereas in the latter there are two (*infuscans* and *infuscans-obsolata*, respectively). B) Morphometric measurements of a female *E. cyathigerum* (all other males and females of *E. cyathigerum* and *I. elegans* were also measured similarly); 1: body length, 2: thorax width, 3: wing length, 4: width of abdomen segment S4, and 5: total abdomen length; C) 17 landmark position on a left forewing of a male *E. cyathigerum* that were used for estimation of the wing shape (all other males and females of *E. cyathigerum* and *I. elegans* were also landmarked similarly). D) a mating pair of *I. elegans* forming a mating wheel. E) a pair of *E. cyathigerum* forming a tandem.

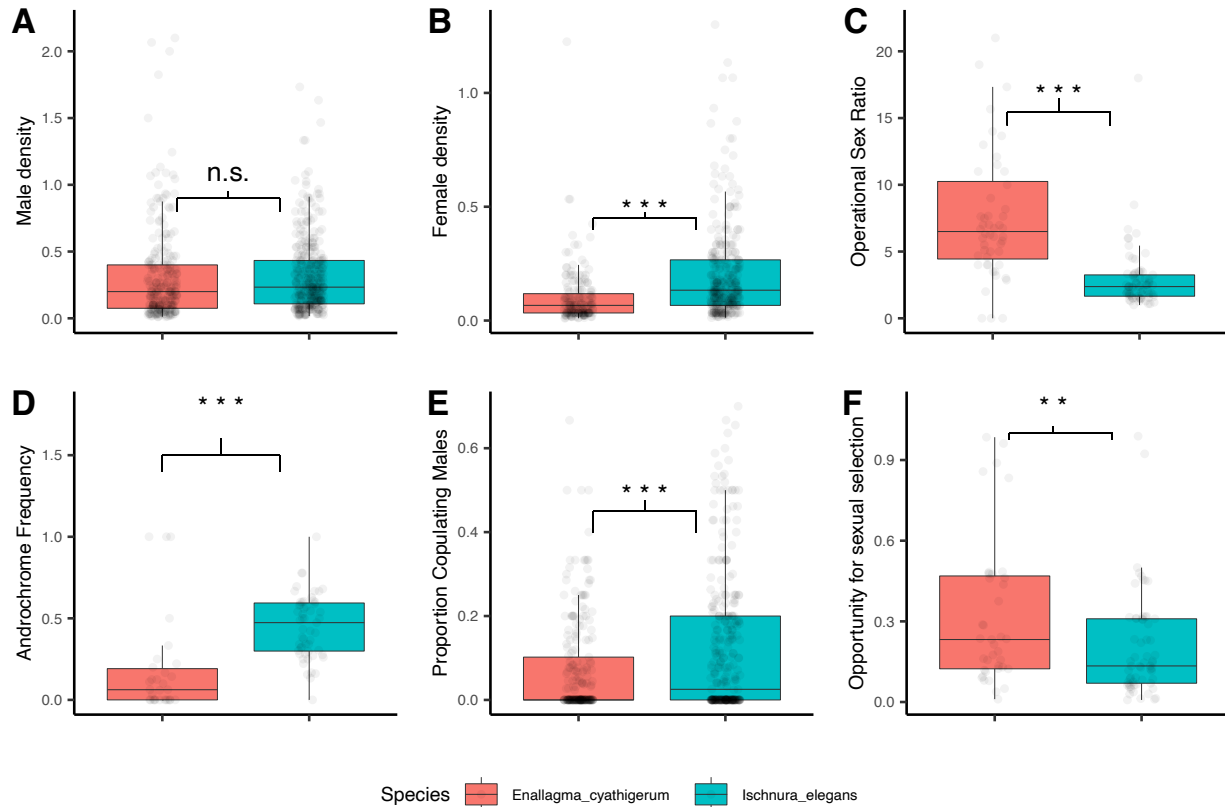

Figure 2: Boxplots (barline in the boxplot represent 50<sup>th</sup> percentile and the intervals represent the range between 1.5 times above 75<sup>th</sup> percentile and below 25<sup>th</sup> percentile) comparing demographic and mating system parameters of *E. cyathigerum* and *I. elegans* across four consecutive years (2018, 2019, 2020, 2021) of sampling. A) Male density, B) female density, C) operational sex ratio, D) androchrome frequency, E) proportion of copulating males, and F) opportunity for sexual selection. The estimates for the mean and standard errors of these parameters are as well as the statistical analysis for comparison between the two species is presented in Table S1 in the supplementary information. Symbols of significance: \*\*\*P < 0.001, \*\*P < 0.01, \*P < 0.05.

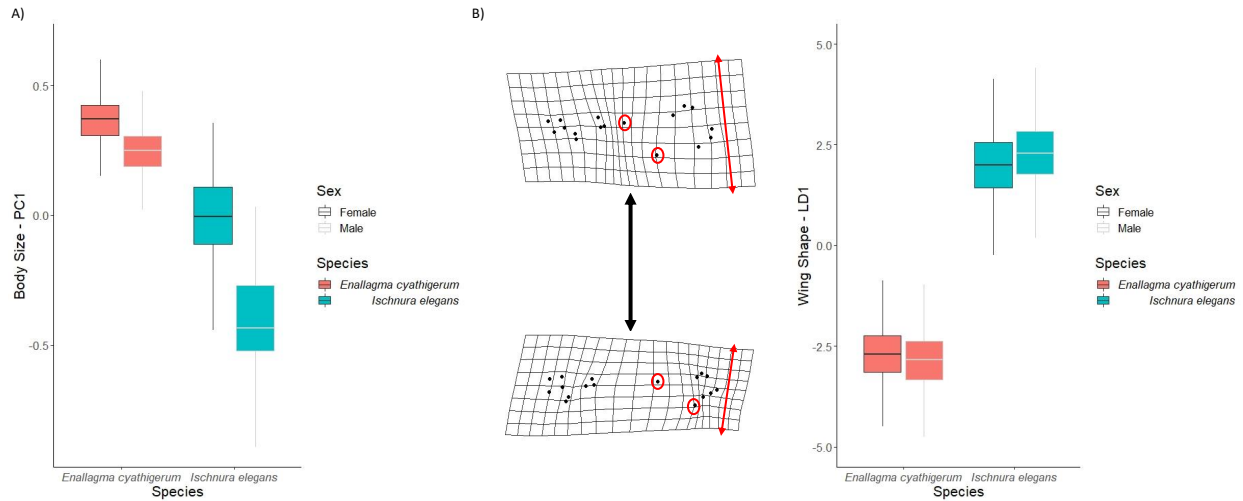

Figure 3: A) Boxplot of body size (PC1) difference between *E. cyathigerum* and *I. elegans* and for males and females within each species (statistical results are presented in Table S2); B) Boxplot representing variation in wing shape (LD1) across *I. elegans* and *E. cyathigerum*. The landmark specimens visualized in this figure were made by exaggerating the minimum and maximum LD1 values by a factor of two (statistical results are presented in Table S3).

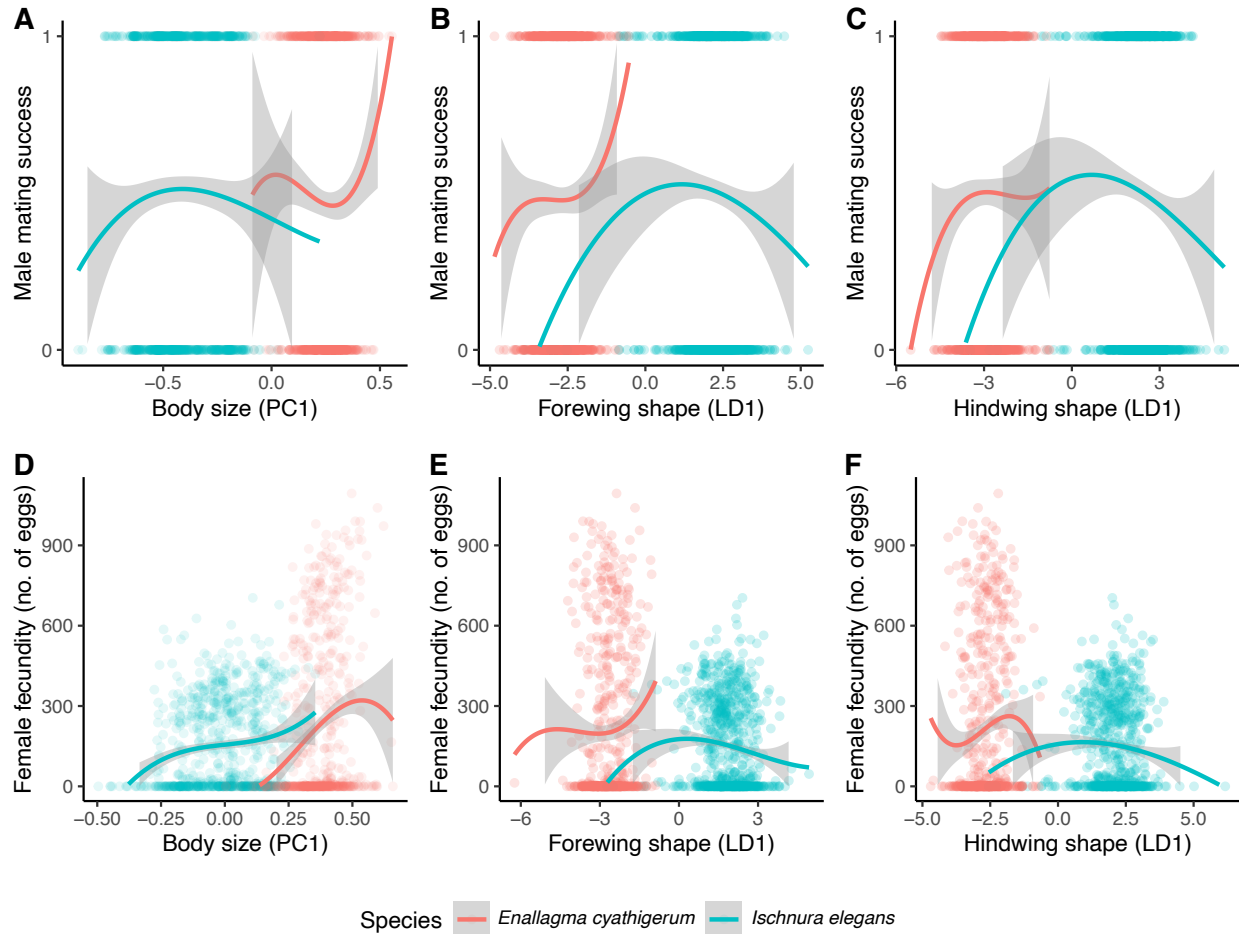

Figure 4: Univariate sexual selection (males, A-C) and fecundity selection (females, D-F) on body size (PC1) and wing shape (LD1) in *E. cyathigerum* and *I. elegans*. Fitness functions visualized using cubic splines and the “loess” function in R. Fitness data on the Y-axis show raw male mating success (1: mated, 0: unmated) and female fecundity (no. of eggs laid). Note that, in our estimations of sexual selection and fecundity-selection, fitness were relativized within species. The gray shaded regions around each spline represents the 95% confidence intervals. A) Selection on body size (PC1) in males, B) Selection on male forewing shape (LD1), C) Selection on male hindwing shape (LD1), D) Selection on body size (PC1) in females, E) Selection on female forewing shape (LD1) F) Selection on female forewing wing shape (LD1). The estimates for the coefficients of selection are presented in Table 1.

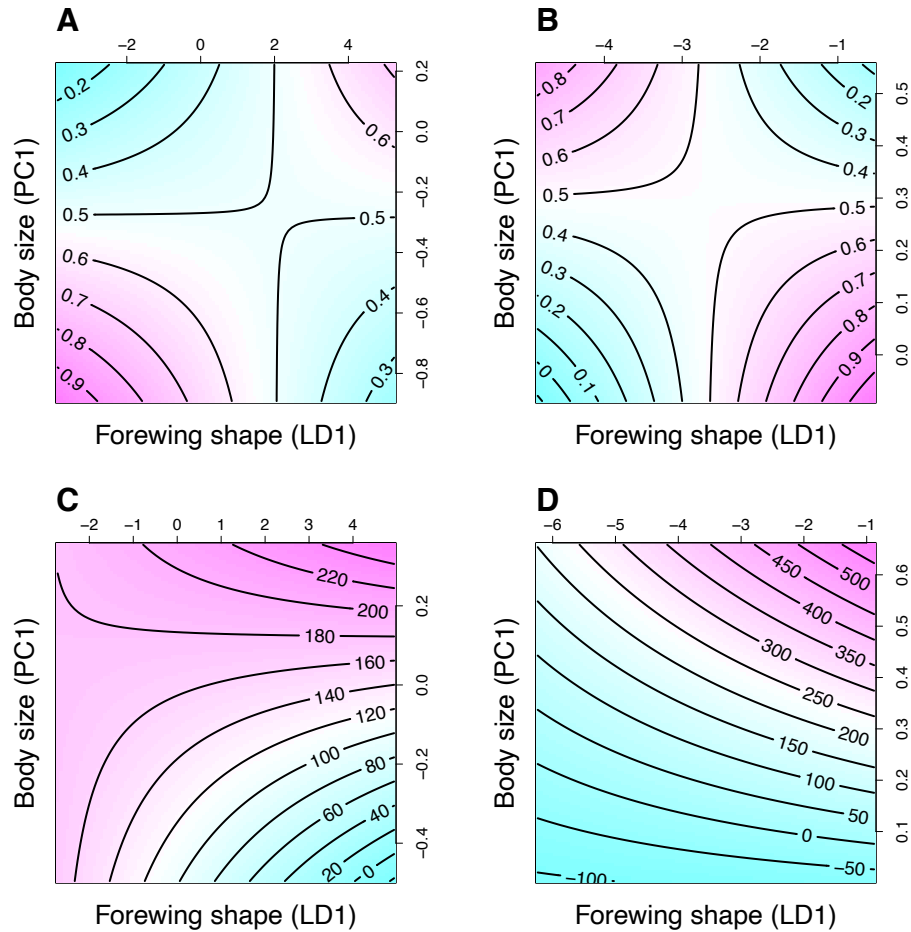

Figure 5: Bivariate fitness surfaces of forewing shape (LD1) and body size (PC1) in A) males of *I. elegans*, B) males of *E. cyathigerum*, C) females of *I. elegans* and D) females of *E. cyathigerum*. The axis perpendicular to the presented plane represents relative fitness, which is the predicted probability of being found as mated in male (A and B) and the predicted number of eggs laid by females (C and D). These fitness surfaces are based on splines from multivariate generalized additive models. The selection coefficients from this model are presented in Table 2. Bivariate fitness surfaces of hindwing shape (LD1) and body size (PC1) are presented in Figure S6.
